# Supplementary material
Source: MDPI journal article supplement (https://www.mdpi.com/2076-3417/7/6/643)
Supplement: s1 [file s1]

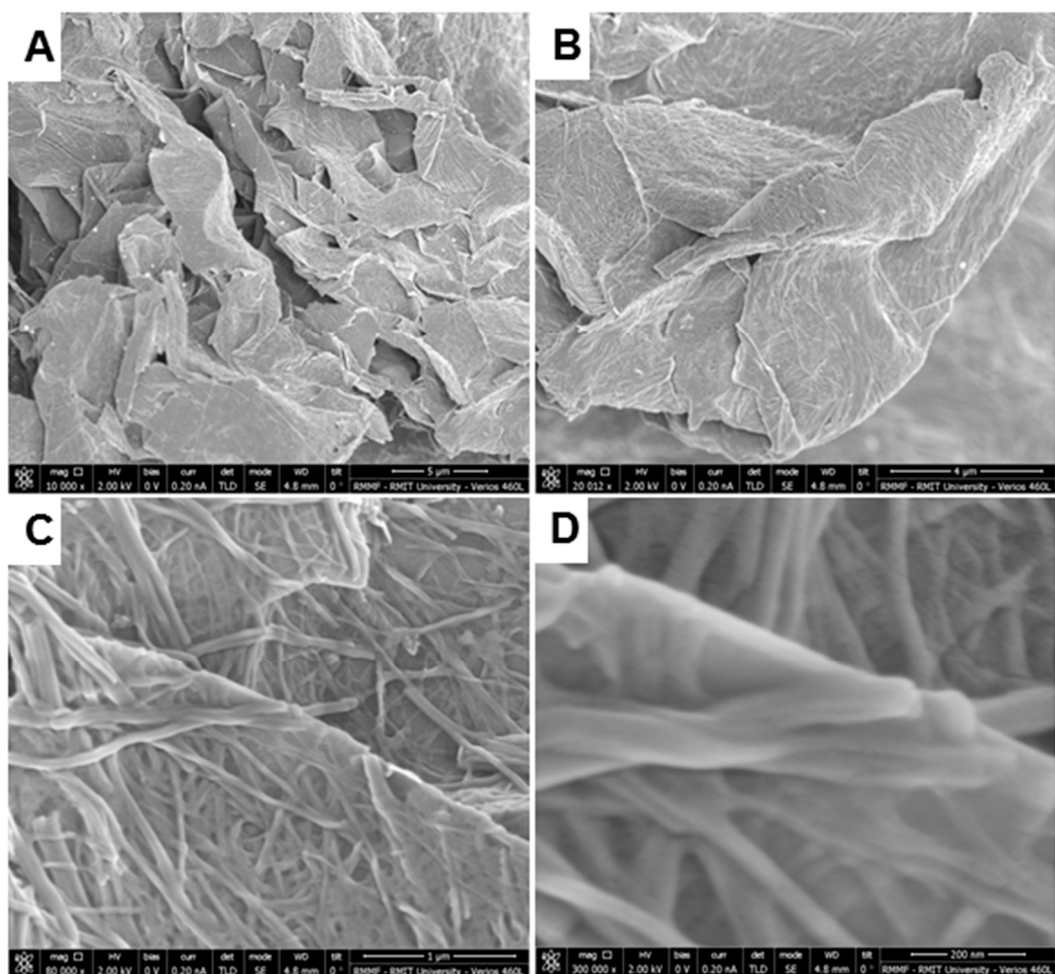

**Figure S1.** SEM images of D-arginine-assisted TCPP nanofibers on graphene.

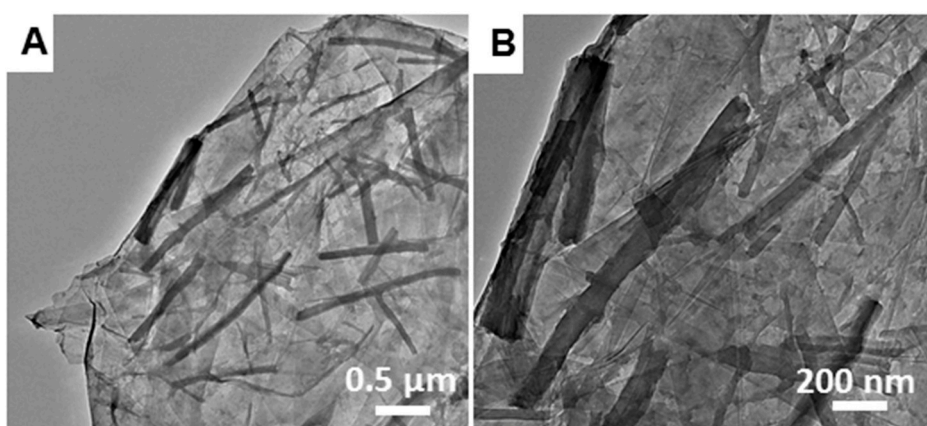

**Figure S2.** TEM images of D-arginine-assisted TCPP nanofibers on graphene.

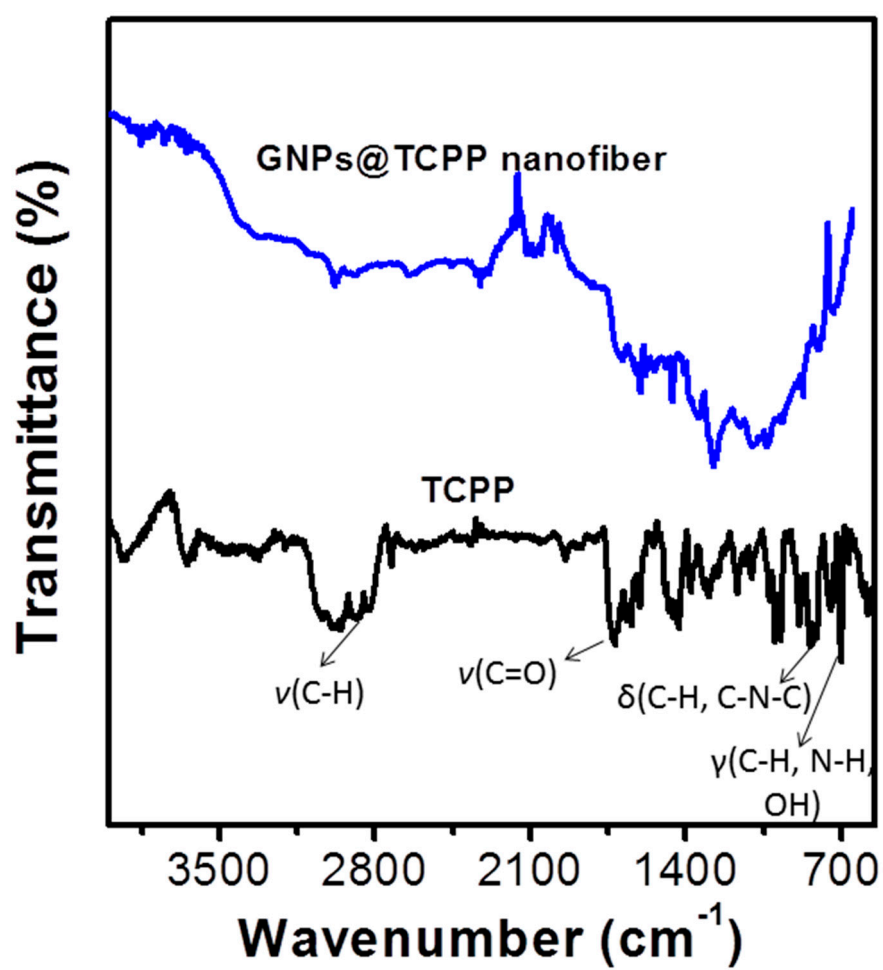

**Figure S3.** FTIR spectra of monomeric TCP molecules (black line) and GNP@TCP nanofibers (blue line)

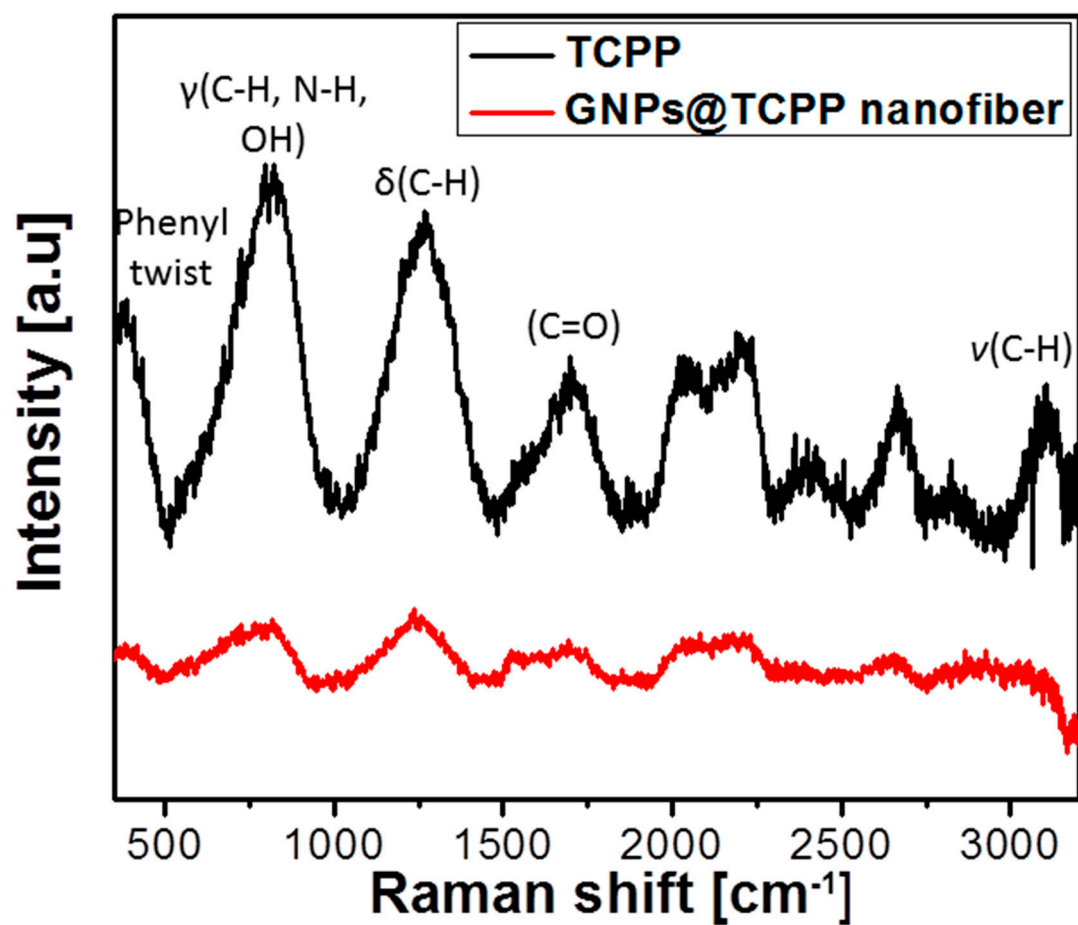

**Figure S4.** Raman spectra of monomeric TCPP molecules (black line) and GNPs@TCPP nanofibers (red line)

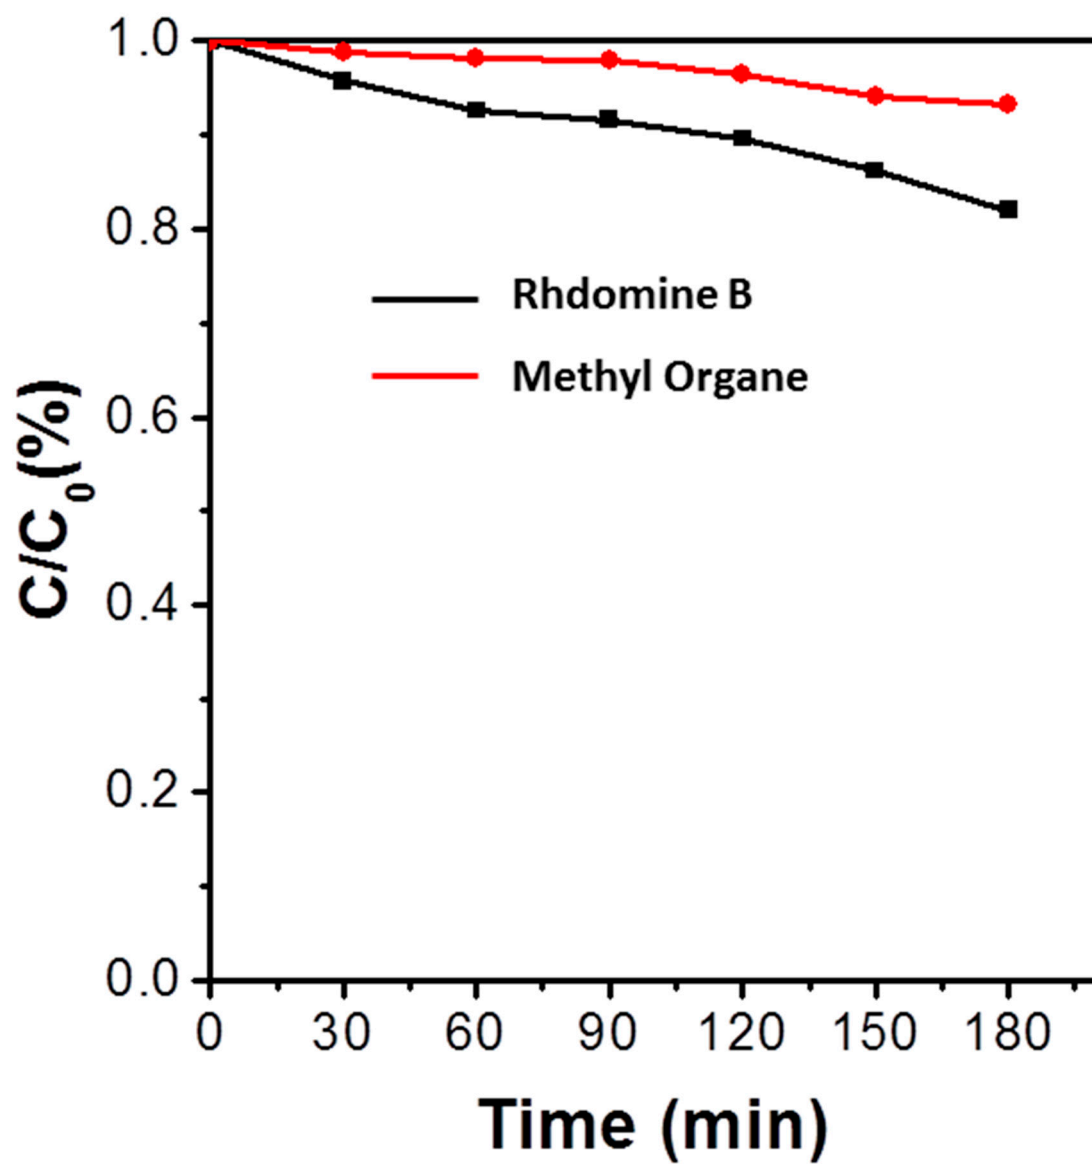

**Figure S5.** Photocatalytic performance of GNPs@TCPP nanofibers toward Rhodamine B and Methyl orange in the dark condition.
